# Supplementary material
Source: publisher figshare collection journal article supplement (https://sage.figshare.com/ndownloader/files/13765160)
Supplement: Supplementary file 1 [file 13765160]

# **The Interface of International Marketing and Entrepreneurship Research: Review, Synthesis, and Future Directions**

Man Yang and Peter Gabrielsson

## **Web Appendix A. Methodological procedures**

### *A. Criteria for defining international marketing and entrepreneurship research*

1. International marketing research defined by the Journal of International Marketing
  - a. International, when marketing activities occur across national boundaries.
  - b. Cross-cultural, when comparing marketing-related issues across national boundaries.
2. Marketing defined by American Marketing Association (2013), Varadarajan (2010), and Webster (1992).
  - a. Marketing is “the activity, set of institutions, and processes for creating, communicating, delivering, and exchanging offerings that have value for customers, clients, partners, and society at large” (AMA 2013).
  - b. Marketing issues include: customer, consumer, export, market entry, internationalization, networks, innovation, product, price, promotion, distribution, channel, brand, internet.
3. Entrepreneurship defined by Shane and Venkataraman (2000).
  - a. Opportunities
  - b. Individuals/entrepreneurial characteristics
4. Peer-reviewed journal articles published in the disciplines of marketing, entrepreneurship and small business management, general management, international business, organizational studies, and strategy.
5. Empirical and conceptual articles from 1997 to 2016.

### *B. Exclusion criteria*

1. Research published in edited books for conference proceedings
2. Editorials, commentaries, features, reports, or review papers
3. Case studies for teaching purposes
4. Articles unavailable electronically
5. Articles published in journals that are not listed in ABS ranking or ranked as level 1

### *C. Search method and scope – Stage I*

1. Full search of articles using EBSCOhost Business Source and Proquest ABI/INFORM databases
2. Initial focus on abstract
3. Search term by the following keywords:

(international OR foreign OR global)

AND

(entrepreneurship OR entrepreneurial OR entrepreneurialism OR entrepreneur OR opportunity)

AND

(marketing OR customer OR consumer OR export OR market OR entry OR internationalization OR -internationalisation OR network OR innovation OR product OR price OR promotion OR distribution OR channel OR brand OR internet)

4. Reading and checking papers to determine inclusion or and exclusion based on fit with definitional and search parameters, and to eliminate duplicate articles from the two databases.

Article sample from databases:  $n = 79$ .

#### *D. Search method and scope – Stage II*

1. A focused/manual search of selected key journals:

a. Journal of International Marketing, International Marketing Review

b. Journal of Marketing, Journal of Marketing Research, Marketing Science, International Journal of Research in Marketing, Journal of the Academy of Marketing Science

c. Entrepreneurship Theory and Practice, Journal of Business Venturing, Strategic Entrepreneurship Journal

d. Journal of International Entrepreneurship

e. Journal of Research in Marketing and Entrepreneurship

f. Journal of International Business Studies, Journal of World Business, International Business Review

g. Academy of Management Journal, Academy of Management Review, Administrative Science Quarterly, Journal of Management Studies

2. Include and exclude based on fit with definitional and search parameters. Extra article sample from manual search:  $n = 90$ .

#### *E. Final sample for analysis: $n = 169$ .*

## Web Appendix B. Overview of the paper sample

| Publication<br>(listed alphabetically)                   | No. of<br>conceptual<br>work | No. of<br>qualitative<br>studies | No. of<br>quantitative<br>studies | No. of<br>mixed-<br>method<br>studies | Sum |
|----------------------------------------------------------|------------------------------|----------------------------------|-----------------------------------|---------------------------------------|-----|
| Asia Pacific Journal of Management                       | 0                            | 1                                | 0                                 | 0                                     | 1   |
| Business History Review                                  | 0                            | 1                                | 0                                 | 0                                     | 1   |
| European Business Review                                 | 0                            | 4                                | 0                                 | 0                                     | 4   |
| European Journal of Marketing                            | 0                            | 4                                | 1                                 | 0                                     | 5   |
| Entrepreneurship and Regional Development                | 0                            | 4                                | 2                                 | 0                                     | 6   |
| Entrepreneurship Theory and Practice                     | 3                            | 1                                | 3                                 | 0                                     | 7   |
| Industrial Marketing Management                          | 0                            | 1                                | 0                                 | 0                                     | 1   |
| International Business Review                            | 2                            | 9                                | 3                                 | 0                                     | 14  |
| International Marketing Review                           | 0                            | 14                               | 5                                 | 1                                     | 20  |
| International Studies of Management and<br>Organization  | 0                            | 1                                | 0                                 | 0                                     | 1   |
| Journal of Business Venturing                            | 1                            | 2                                | 4                                 | 0                                     | 7   |
| Journal of International Business Studies                | 2                            | 2                                | 4                                 | 0                                     | 8   |
| Journal of International Entrepreneurship                | 3                            | 21                               | 19                                | 2                                     | 45  |
| Journal of International Marketing                       | 0                            | 10                               | 1                                 | 0                                     | 11  |
| Journal of Marketing Management                          | 0                            | 1                                | 1                                 | 0                                     | 2   |
| Journal of Product Innovation Management                 | 0                            | 0                                | 2                                 | 0                                     | 2   |
| Journal of Research in Marketing and<br>Entrepreneurship | 0                            | 0                                | 1                                 | 0                                     | 1   |
| Journal of Small Business Management                     | 0                            | 1                                | 1                                 | 0                                     | 2   |
| Journal of Small Business and Enterprise<br>Development  | 0                            | 10                               | 3                                 | 0                                     | 13  |
| Journal of the Academy of Marketing Science              | 0                            | 0                                | 0                                 | 1                                     | 1   |
| Journal of World Business                                | 1                            | 3                                | 3                                 | 0                                     | 7   |
| Management International Review                          | 0                            | 3                                | 0                                 | 0                                     | 3   |
| Multinational Business Review                            | 0                            | 1                                | 1                                 | 0                                     | 2   |
| Service Industries Journal                               | 0                            | 1                                | 1                                 | 0                                     | 2   |
| Strategic Entrepreneurship Journal                       | 0                            | 1                                | 1                                 | 0                                     | 2   |
| Strategic Management Journal                             | 0                            | 0                                | 0                                 | 1                                     | 1   |
| Total                                                    | 12                           | 95                               | 57                                | 5                                     | 169 |

### Web Appendix C. Research articles in the review

| Type 1: Individual-focused cross-cultural comparative marketing research                 |                                          |                                                                                                                                                                                                                                                                                                                                                                                                                                                                                                                                                                                                                                                                                                                                                                                                                                                                |                                                                      |
|------------------------------------------------------------------------------------------|------------------------------------------|----------------------------------------------------------------------------------------------------------------------------------------------------------------------------------------------------------------------------------------------------------------------------------------------------------------------------------------------------------------------------------------------------------------------------------------------------------------------------------------------------------------------------------------------------------------------------------------------------------------------------------------------------------------------------------------------------------------------------------------------------------------------------------------------------------------------------------------------------------------|----------------------------------------------------------------------|
| Theme                                                                                    | Papers                                   |                                                                                                                                                                                                                                                                                                                                                                                                                                                                                                                                                                                                                                                                                                                                                                                                                                                                |                                                                      |
| Entry to new business (1)                                                                | Block et al. 2013                        |                                                                                                                                                                                                                                                                                                                                                                                                                                                                                                                                                                                                                                                                                                                                                                                                                                                                |                                                                      |
| FDI (1)                                                                                  | Pathak, Laplume and Xavier-Oliveira 2015 |                                                                                                                                                                                                                                                                                                                                                                                                                                                                                                                                                                                                                                                                                                                                                                                                                                                                |                                                                      |
| Total (2 studies)                                                                        |                                          |                                                                                                                                                                                                                                                                                                                                                                                                                                                                                                                                                                                                                                                                                                                                                                                                                                                                |                                                                      |
| Type 2: Opportunity-focused cross-cultural comparative marketing research                |                                          |                                                                                                                                                                                                                                                                                                                                                                                                                                                                                                                                                                                                                                                                                                                                                                                                                                                                |                                                                      |
| Theme                                                                                    | Papers                                   |                                                                                                                                                                                                                                                                                                                                                                                                                                                                                                                                                                                                                                                                                                                                                                                                                                                                |                                                                      |
| Market orientation (1)                                                                   | Brettel, Engelen and Heinemann 2009      |                                                                                                                                                                                                                                                                                                                                                                                                                                                                                                                                                                                                                                                                                                                                                                                                                                                                |                                                                      |
| Marketing cooperation (1)                                                                | Felzensztein and Gimmon 2009             |                                                                                                                                                                                                                                                                                                                                                                                                                                                                                                                                                                                                                                                                                                                                                                                                                                                                |                                                                      |
| Total (2 studies)                                                                        |                                          |                                                                                                                                                                                                                                                                                                                                                                                                                                                                                                                                                                                                                                                                                                                                                                                                                                                                |                                                                      |
| Type 3: Individual and opportunity-focused cross-cultural comparative marketing research |                                          |                                                                                                                                                                                                                                                                                                                                                                                                                                                                                                                                                                                                                                                                                                                                                                                                                                                                |                                                                      |
| Theme                                                                                    | Papers                                   |                                                                                                                                                                                                                                                                                                                                                                                                                                                                                                                                                                                                                                                                                                                                                                                                                                                                |                                                                      |
| Total (0)                                                                                |                                          |                                                                                                                                                                                                                                                                                                                                                                                                                                                                                                                                                                                                                                                                                                                                                                                                                                                                |                                                                      |
| Type 4: Individual-focused foreign marketing research                                    |                                          |                                                                                                                                                                                                                                                                                                                                                                                                                                                                                                                                                                                                                                                                                                                                                                                                                                                                |                                                                      |
| Major theme                                                                              | Sub-theme                                | Papers                                                                                                                                                                                                                                                                                                                                                                                                                                                                                                                                                                                                                                                                                                                                                                                                                                                         |                                                                      |
| Internationalization (63)                                                                | Influences (31)                          | Hamill and Gregory 1997; Crick and Jones 2000; Andersson 2002; Andersson and Victor 2003; McDougall, Oviatt and Shrader 2003; Zahra 2003; Andersson 2004; Berry and Brock 2004; Acedo and Florin 2006; Hutchinson, Quinn and Alexander 2006; Acedo and Jones 2007; Meliá, Pérez and Dobón 2010; Thai and Chong 2008; Evers 2010; Nkongolo-Bakenda et al. 2010; Tseng and Johnsen 2011; Pettersen and Tobiassen 2012; Shirokova and McDougall-Covin 2012; Laurell, Andersson and Achtenhagen 2013; Andersson, Evers and Griot 2013; Kollmann and Christofor 2014; Loane, Bell and Cunningham 2014; Milanov and Fernhaber 2014; Omri and Becuwe 2014; Vissak and Zhang 2014; Denicolai, Hagen and Pisoni 2015; Sui, Morgan and Baum 2015; Andersson and Berggren 2016; Bai, Johanson and Martín 2016; Ricard, Pennec and Reynaud 2016; Roy, Sekhar and Vyas 2016 |                                                                      |
|                                                                                          | Processes and patterns (21)              | Madsen and Servais 1997; Preece, Miles and Baetz 1999; Andersson 2000; Bell et al. 2003; Chetty and Campbell-Hunt 2004; Park and Bae 2004; Rialp et al. 2005; Gabrielsson and Pelkonen 2008; Liu, Xiao and Huang 2008; Crick 2009; Amal and Filho 2010; Dib, Rocha and Silva 2010; Zou and Ghauri 2010; Kontinen and Ojala 2012a; Kontinen and Ojala 2012b; Freeman, Deligonul and Cavusgil 2013; Crick and Crick 2014; Hewerdine, Rumyantseva and Welch 2014; Jørgensen 2014; Schueffel, Baldegger and Amann 2014; Verbeke, Zargarzadeh and Osiyevskyy 2014                                                                                                                                                                                                                                                                                                   |                                                                      |
|                                                                                          | Entrepreneurial approach (4)             | Jones and Coviello 2005; Freeman and Cavusgil 2007; Terjesen and Elam 2009; Jones and Casulli 2014                                                                                                                                                                                                                                                                                                                                                                                                                                                                                                                                                                                                                                                                                                                                                             |                                                                      |
|                                                                                          | Performance outcomes (3)                 | Kuivalainen et al. 2010; Musteen and Datta 2011; Li, Qian and Qian 2012                                                                                                                                                                                                                                                                                                                                                                                                                                                                                                                                                                                                                                                                                                                                                                                        |                                                                      |
|                                                                                          | Strategic orientations (2)               | Kocak and Abimbola 2009; Odorici and Presutti 2013                                                                                                                                                                                                                                                                                                                                                                                                                                                                                                                                                                                                                                                                                                                                                                                                             |                                                                      |
|                                                                                          | Market strategy (2)                      | Crick 2007; Felzensztein et al. 2015                                                                                                                                                                                                                                                                                                                                                                                                                                                                                                                                                                                                                                                                                                                                                                                                                           |                                                                      |
|                                                                                          | Foreign market entry (6)                 | Determinants (3)                                                                                                                                                                                                                                                                                                                                                                                                                                                                                                                                                                                                                                                                                                                                                                                                                                               | Ojala and Tyrväinen 2006; Ojala 2009; Domurath and Patzelt 2016      |
|                                                                                          |                                          | Mode and strategies (2)                                                                                                                                                                                                                                                                                                                                                                                                                                                                                                                                                                                                                                                                                                                                                                                                                                        | Zacharakis 1997; Burgel and Murray 2000                              |
|                                                                                          |                                          | Market penetration (1)                                                                                                                                                                                                                                                                                                                                                                                                                                                                                                                                                                                                                                                                                                                                                                                                                                         | Arenius 2005                                                         |
|                                                                                          | Export (7)                               | Antecedents (2)                                                                                                                                                                                                                                                                                                                                                                                                                                                                                                                                                                                                                                                                                                                                                                                                                                                | Westhead, Wright and Usbasaran 1999; Lafuente, Stoian and Rialp 2015 |
| Incentives (1)                                                                           |                                          | Ahmed et al. 2006                                                                                                                                                                                                                                                                                                                                                                                                                                                                                                                                                                                                                                                                                                                                                                                                                                              |                                                                      |
| Performance outcomes (4)                                                                 |                                          | Yeoh 2004; Mostafa, Wheeler and Jones 2006; Filatotchev et al. 2009; Ganotakis and Love 2012                                                                                                                                                                                                                                                                                                                                                                                                                                                                                                                                                                                                                                                                                                                                                                   |                                                                      |
| Networks (6)                                                                             | Marketing system or functions (2)        | Iyer and Shapiro 1999; Harris and Wheeler 2005                                                                                                                                                                                                                                                                                                                                                                                                                                                                                                                                                                                                                                                                                                                                                                                                                 |                                                                      |
|                                                                                          | Foreign market knowledge (1)             | Musteen, Datta and Butts 2014                                                                                                                                                                                                                                                                                                                                                                                                                                                                                                                                                                                                                                                                                                                                                                                                                                  |                                                                      |
|                                                                                          | Dynamics (2)                             | Coviello 2006; Chetty and Söderqvist 2013                                                                                                                                                                                                                                                                                                                                                                                                                                                                                                                                                                                                                                                                                                                                                                                                                      |                                                                      |

|                                                                                             | Market knowledge (1)                  | Fuerst and Zetting 2015                                                                                                                                                                                                                                                                                        |
|---------------------------------------------------------------------------------------------|---------------------------------------|----------------------------------------------------------------------------------------------------------------------------------------------------------------------------------------------------------------------------------------------------------------------------------------------------------------|
| Marketing mix (4)                                                                           | Product (1)                           | Evers 2011                                                                                                                                                                                                                                                                                                     |
|                                                                                             | Branding (2)                          | Gabrielsson 2005; Spence and Essoussi 2010                                                                                                                                                                                                                                                                     |
|                                                                                             | Channel (1)                           | Arenius, Sasi and Gabrielsson 2006                                                                                                                                                                                                                                                                             |
| Entrepreneurial marketing (1)                                                               |                                       | Hallbäck and Gabrielsson 2013                                                                                                                                                                                                                                                                                  |
| Marketing capabilities (2)                                                                  |                                       | Falay et al. 2007; Yuan, Bao, and Olson 2016                                                                                                                                                                                                                                                                   |
| Consumer (1)                                                                                |                                       | Chandra and Coviello 2010                                                                                                                                                                                                                                                                                      |
| Outsourcing (1)                                                                             |                                       | Mazzanti, Montresor and Pini 2011                                                                                                                                                                                                                                                                              |
| Total (91 studies)                                                                          |                                       |                                                                                                                                                                                                                                                                                                                |
| <i>Type 5: Opportunity-focused foreign marketing research</i>                               |                                       |                                                                                                                                                                                                                                                                                                                |
| Major theme                                                                                 | Sub-theme                             | Papers                                                                                                                                                                                                                                                                                                         |
| Internationalization (21)                                                                   | Patterns and influences (8)           | Coviello and Martin 1999; Hohenthal, Johanson and Johanson 2003; Oviatt and McDougall 2005; Barrutia and Echebarria 2007; Westhead 2008; O’Cass and Weerawardena 2009; Chandra, Styles and Wilkinson 2012; Colapinto et al. 2015                                                                               |
|                                                                                             | Process (3)                           | Mathews and Zander 2007; Chandra, Styles and Wilkinson 2009; Kontinen and Ojala 2011                                                                                                                                                                                                                           |
|                                                                                             | Market selection (1)                  | Sakarya, Eckman and Hyllegard 2007                                                                                                                                                                                                                                                                             |
|                                                                                             | Marketing capabilities (1)            | Kaufmann and Roesch 2012                                                                                                                                                                                                                                                                                       |
|                                                                                             | Internet (2)                          | Reuber and Fischer 2011; Glavas, Mathews and Bianchi 2016                                                                                                                                                                                                                                                      |
|                                                                                             | Networks/social ties (5)              | Ellis 2000; Han 2006; Brown, McNaughton, and Bell 2010; Ellis 2011; O’Gorman and Evers 2011                                                                                                                                                                                                                    |
|                                                                                             | Entrepreneurial knowledge (1)         | Mejri and Umemoto 2010                                                                                                                                                                                                                                                                                         |
| Operation mode (3)                                                                          | Export (1)                            | Sheng and Mullen 2011                                                                                                                                                                                                                                                                                          |
|                                                                                             | International joint ventures (1)      | Mainela and Puhakka 2009                                                                                                                                                                                                                                                                                       |
|                                                                                             | International strategic alliances (1) | Haskell, Veilleux, and Béliveau 2016                                                                                                                                                                                                                                                                           |
| Corporate entrepreneurship (2)                                                              |                                       | Birkinshaw 1997; Tasavori, Ghauri and Zaefarian 2016                                                                                                                                                                                                                                                           |
| Business model (1)                                                                          |                                       | Sainio et al. 2011                                                                                                                                                                                                                                                                                             |
| Total (27 studies)                                                                          |                                       |                                                                                                                                                                                                                                                                                                                |
| <i>Type 6: Individual and opportunity-focused foreign marketing research</i>                |                                       |                                                                                                                                                                                                                                                                                                                |
| Major theme                                                                                 | Sub-theme                             | Papers                                                                                                                                                                                                                                                                                                         |
| Internationalization (17)                                                                   | Process and influences (14)           | McAuley 1999; Fletcher 2004; Crick and Spence 2005; Nordman and Melén 2008; Schweizer, Vahlne and Johanson 2010; Andersson 2011; Evers and O’Gorman 2011; Lamb, Sandberg and Liesch 2011; Santos and García 2011; Kumar 2012; Li 2013; Galkina and Chetty 2015; Muzychenko and Liesch 2015; Stoian et al. 2016 |
|                                                                                             | Networks (2)                          | Sullivan Mort and Weerawardena 2006; Vasilchenko and Morrish 2011                                                                                                                                                                                                                                              |
|                                                                                             | International commitment (1)          | Rocha, Mello, and Farias 2012                                                                                                                                                                                                                                                                                  |
| Entrepreneurial marketing (1)                                                               |                                       | Sullivan Mort, Weerawardena and Liesch 2012                                                                                                                                                                                                                                                                    |
| Opportunity portfolio process (1)                                                           |                                       | Chandra, Styles and Wilkinson 2015                                                                                                                                                                                                                                                                             |
| SME growth (1)                                                                              |                                       | Hulbert, Gilmore, and Carson 2013                                                                                                                                                                                                                                                                              |
| INV development (2)                                                                         |                                       | Mainela, Pernu and Puhakka 2011; Gabrielsson and Gabrielsson 2013                                                                                                                                                                                                                                              |
| Total (22 studies)                                                                          |                                       |                                                                                                                                                                                                                                                                                                                |
| <i>Type 7: Individual-focused cross-cultural comparative and foreign marketing research</i> |                                       |                                                                                                                                                                                                                                                                                                                |
| Theme                                                                                       | Papers                                |                                                                                                                                                                                                                                                                                                                |

|                                                                                                             |                                                                                                                                                                                                                                      |
|-------------------------------------------------------------------------------------------------------------|--------------------------------------------------------------------------------------------------------------------------------------------------------------------------------------------------------------------------------------|
| Internationalization (9)                                                                                    | Andersson and Evangelista 2006; Loane 2006; Gassmann and Keupp 2007; Terjesen, O'Gorman and Acs 2008; Sommer 2010; Cunningham, Loane and Ibbotson 2012; Cannone and Ughetto 2014; Hagen and Zucchella 2014; Weerawardena et al. 2015 |
| Channels (1)                                                                                                | Gabrielsson and Kirpalani 2004                                                                                                                                                                                                       |
| Brand (1)                                                                                                   | da Silva Lopes and Casson 2007                                                                                                                                                                                                       |
| Customer orientation (1)                                                                                    | Deshpandé et al. 2013                                                                                                                                                                                                                |
| Marketing capabilities (1)                                                                                  | Evers, Andersson, and Hannibal 2012                                                                                                                                                                                                  |
| Networks (1)                                                                                                | Chung and Tung 2013                                                                                                                                                                                                                  |
| Decision making (1)                                                                                         | Nummela et al. 2014                                                                                                                                                                                                                  |
| Total (15 studies)                                                                                          |                                                                                                                                                                                                                                      |
| <i>Type 8: Opportunity-focused cross-cultural comparative and foreign marketing research</i>                |                                                                                                                                                                                                                                      |
| Theme                                                                                                       | Papers                                                                                                                                                                                                                               |
| Internationalization (2)                                                                                    | Yamakawa et al. 2013; Dimitritos et al. 2016                                                                                                                                                                                         |
| Foreign market entry (1)                                                                                    | Bingham 2009                                                                                                                                                                                                                         |
| Networks (1)                                                                                                | Loane and Bell 2006                                                                                                                                                                                                                  |
| Windows of opportunity (2)                                                                                  | Kleinschmidt, Brentani and Salomo 2007; Brentani, Kleinschmidt and Salomo 2010                                                                                                                                                       |
| Total (6 studies)                                                                                           |                                                                                                                                                                                                                                      |
| <i>Type 9: Individual and opportunity-focused cross-cultural comparative and foreign marketing research</i> |                                                                                                                                                                                                                                      |
| Theme                                                                                                       | Papers                                                                                                                                                                                                                               |
| Internationalization (2)                                                                                    | Johnson 2004; Langseth, O'Dwyer and Arpa 2016                                                                                                                                                                                        |
| Decision making (2)                                                                                         | Spence and Crick 2006; Chetty, Ojala and Leppäaho 2015                                                                                                                                                                               |
| Total (4 studies)                                                                                           |                                                                                                                                                                                                                                      |
